# Supplementary material
Source: PubMed Central journal article supplement (PMC4096367)
Supplement: 3fc97d679edb8ffffeac22b67f1cc314_genetics.114.163311-7.pdf [file 3fc97d679edb8ffffeac22b67f1cc314_genetics.114.163311-7.pdf]

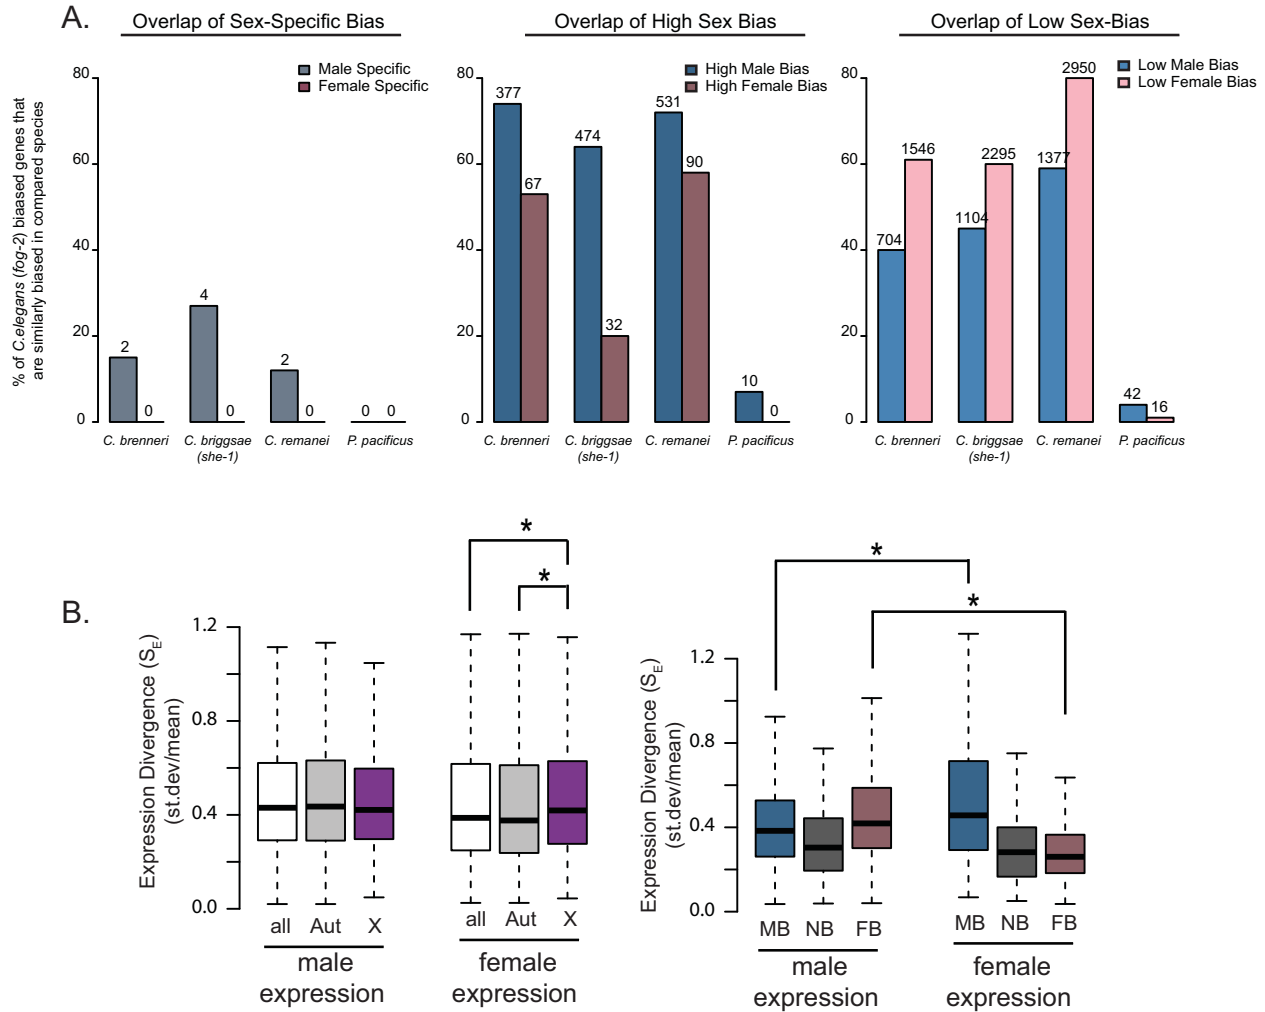

**Figure S5** **A)** The percentage of genes in *C. elegans* with a similarly sex-biased 1:1 ortholog in the indicated species is plotted. Numbers above each bar indicated the number of 1:1 orthologs with similar bias. Percentage of overlap is plotted for *C. elegans (fog-2)* sex-specific genes (**Left**), high sex-biased genes (**Middle**), and low sex-biased genes (**Right**). **B)** Using *Caenorhabditis* 1:1:1:1 orthologs, we calculated the interspecies expression divergence for each gene as the coefficient of variation ( $\sigma/\mu$ ). Left panel shows male and female expression divergence for all (white), autosomal (grey) and X-linked (purple) genes. Right panel shows male and female expression divergence for male-biased (MB, blue), female-biased (FB, pink), and non-biased (NB, dark grey) genes. (\*) indicates significant difference in distribution ( $p$ -value  $< 0.01$ ) as calculated by Mann-Whitney test.
