# Supplementary material
Source: PubMed Central journal article supplement (PMC4096367)
Supplement: 84a2de0719cb7c3874e309939123f327_genetics.114.163311-5.pdf [file 84a2de0719cb7c3874e309939123f327_genetics.114.163311-5.pdf]

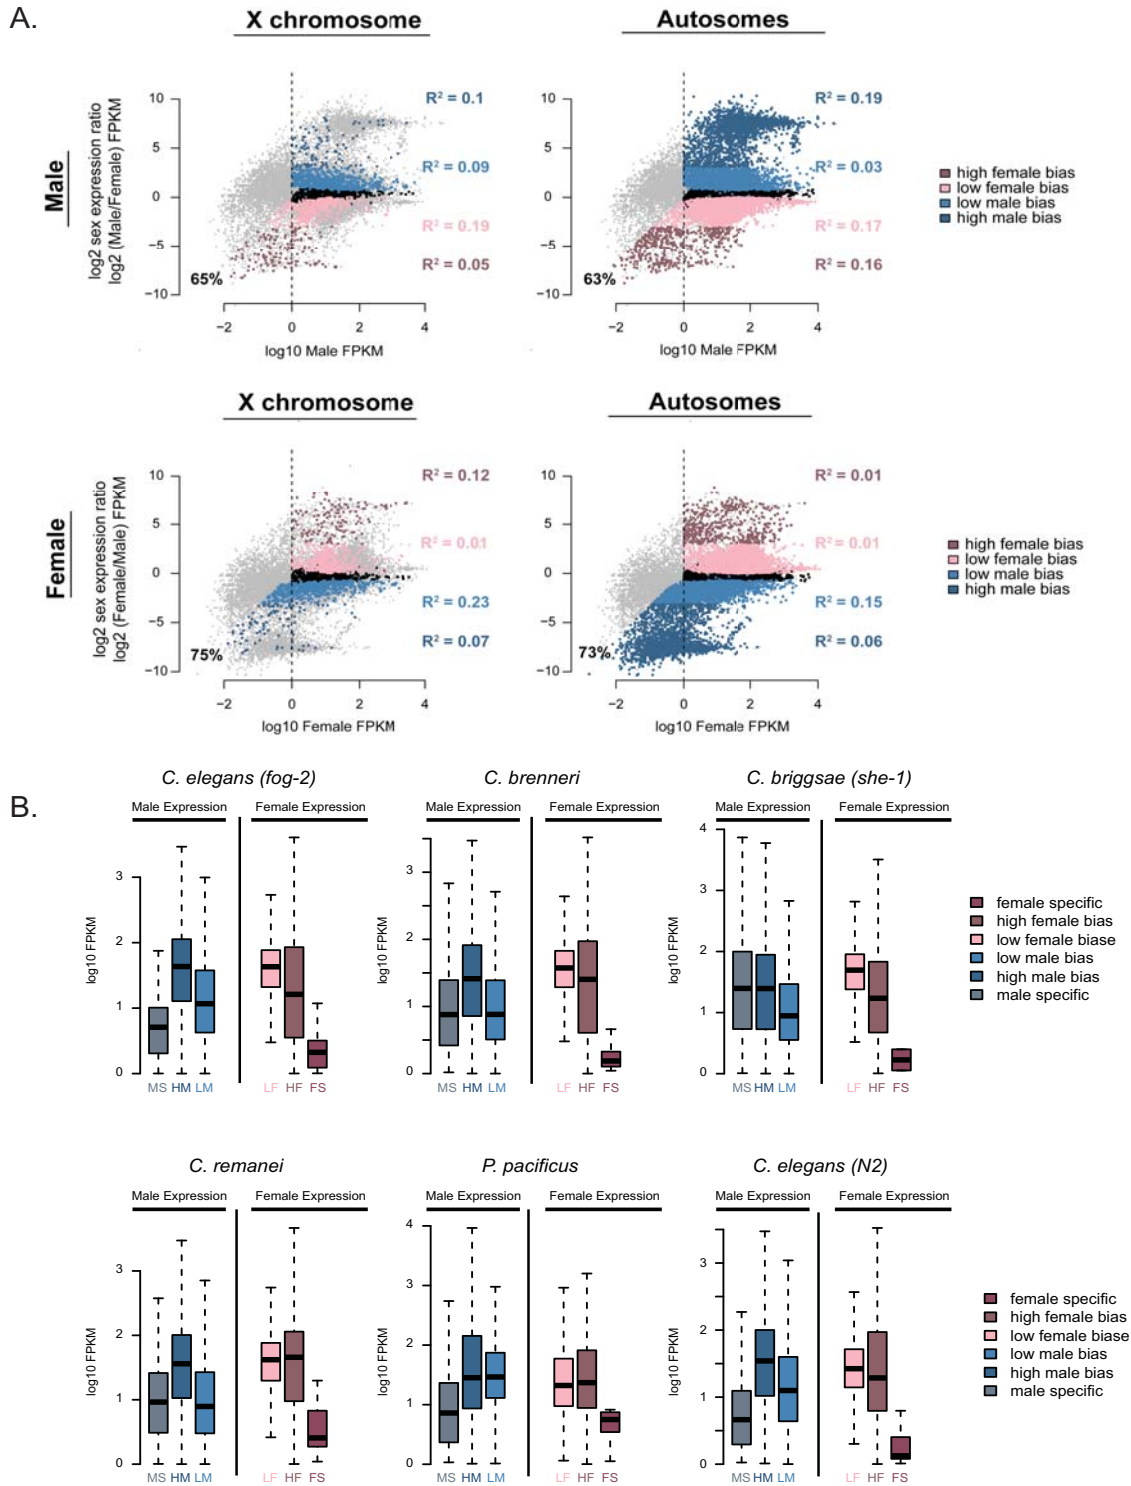

**Figure S2** **A)** As in Supplemental Figure 1, for *C. elegans (fog-2)* data. Plots are separated by X (left panels) and autosomes (right panels). **B)** For all species, boxplots indicate the range of expression (calculated as the log<sub>10</sub> FPKM) of each sex-bias category. Male expression is plotted for male-biased genes (left 3 boxes); female expression is plotted for female-biased genes (right 3 boxes). Overall, sex-specific genes are expressed at low levels in the corresponding sex. (MS – Male-Specific, HM – High Male, LM – Low Male, LF – Low Female, HF – High Female, FS – Female Specific).
