# Supplementary material
Source: PubMed Central journal article supplement (PMC4096367)
Supplement: b9bcacb3daa0a7207ead448d8aaa83d7_genetics.114.163311-4.pdf [file b9bcacb3daa0a7207ead448d8aaa83d7_genetics.114.163311-4.pdf]

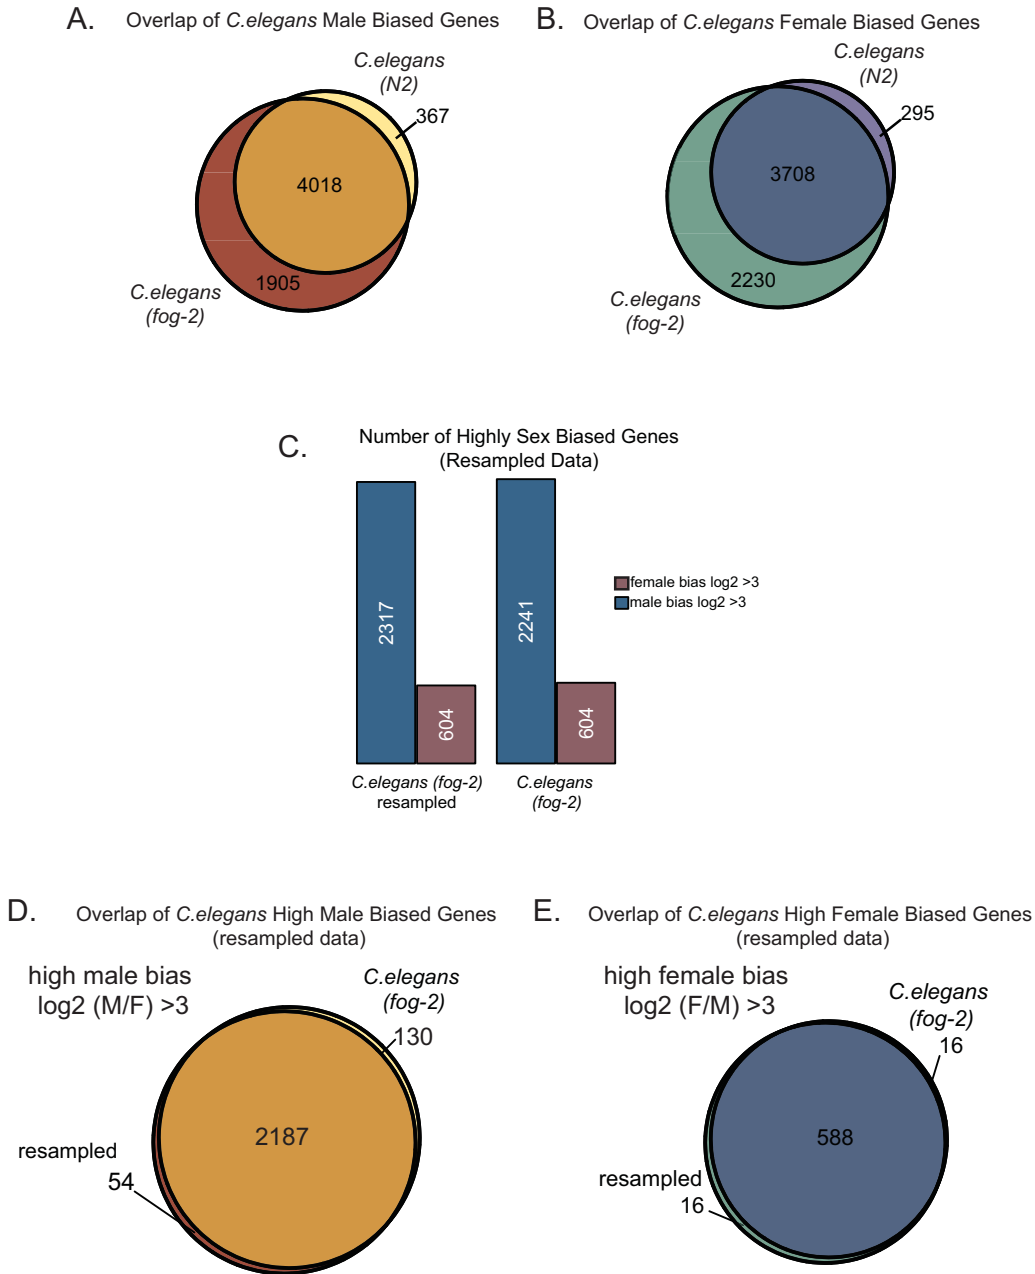

**Figure S3** **A)** Sets of male and female-biased genes were determined individually using *C. elegans* (*N2*) (male-hermaphrodite) and (*fog-2*) (male-female) data. Sex-biased genes (including sex-specific genes) are those called differentially expressed by DESeq ( $q$  value  $< 0.05$ ) and with FPKM  $> 1$  in at least one sex. Overlap of male-biased genes is plotted. **B)** Same as in **A** but overlap of female-biased genes is plotted. **C)** *C. elegans (fog-2)* mapped reads were resampled to match the number of mapped reads in *P. pacificus*. Using the resampled data, we identified genes with sex-biased expression. Plot indicates the number of genes with high male and high female-bias ( $\log_2$  sex expression ratio  $> 3$ ) for the resampled data (left) and for the original *C. elegans (fog-2)* data. **D)** Overlap of high male-biased genes in the original and the resampled *C. elegans (fog-2)* data. **E)** Same as in **D** but for high female-biased genes.
