# Supplementary material
Source: PubMed Central journal article supplement (PMC4096367)
Supplement: b643b44f1f3ffa985a652b08ab12f15b_genetics.114.163311-8.pdf [file b643b44f1f3ffa985a652b08ab12f15b_genetics.114.163311-8.pdf]

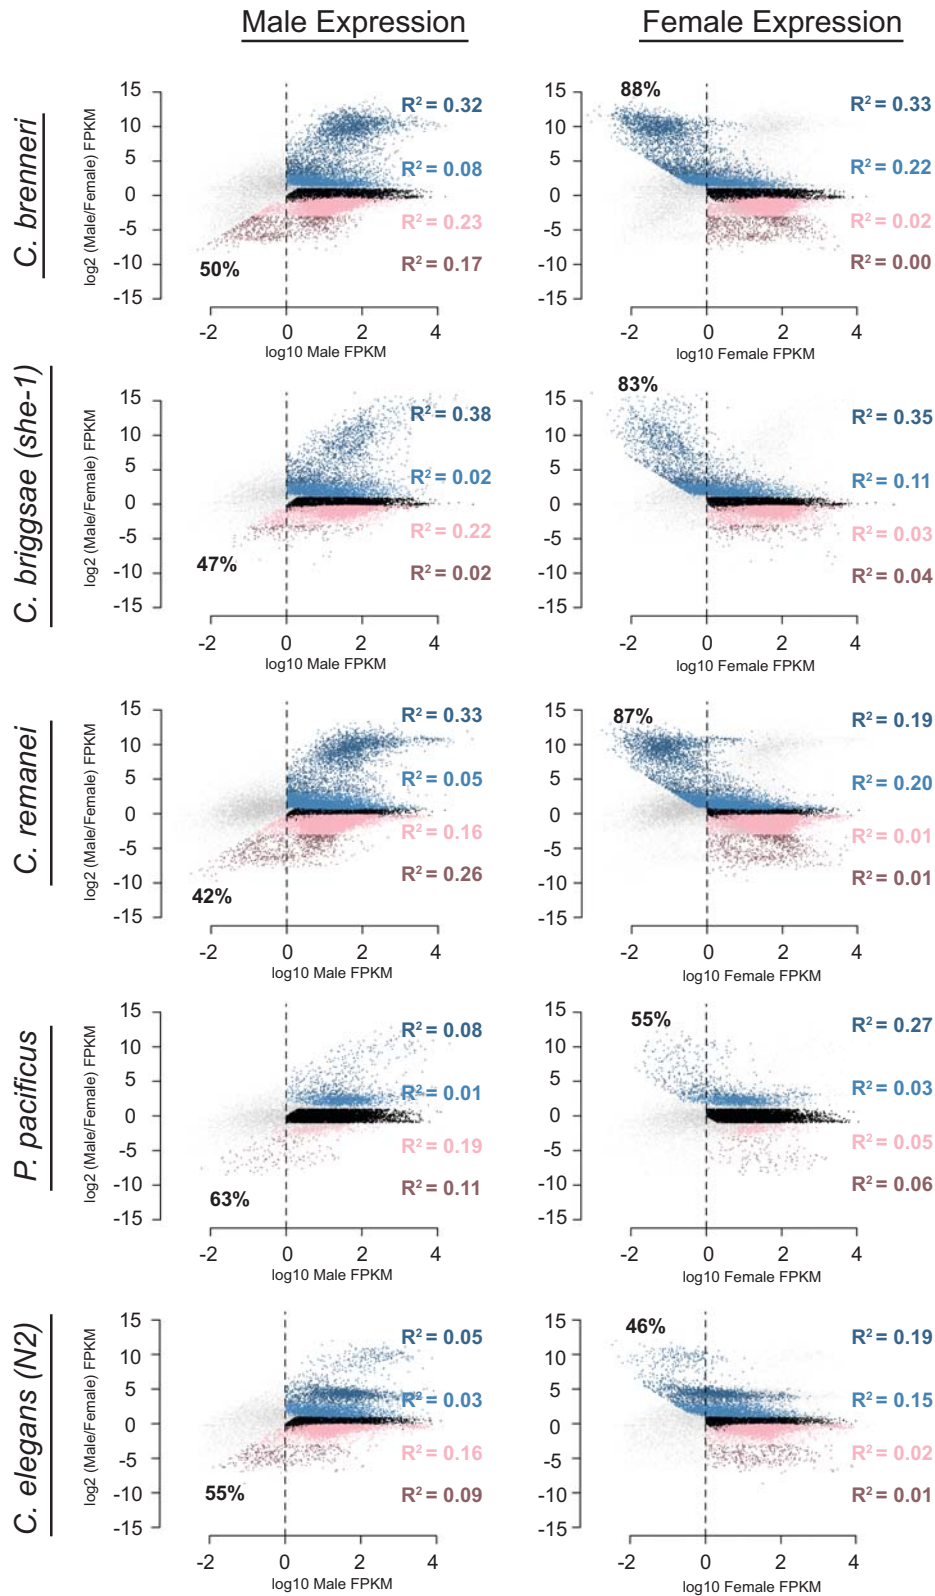

**Figure S1** For each species, the magnitude of sex-biased expression ( $\log_2$  sex expression ratio, (Male/Female) FPKM) is plotted against the level of expression ( $\log_{10}$  FPKM) in males (left panels) and females (right panels). Dashed line indicates FPKM=1. Percentages of high sex-biased genes with low expression (FPKM < 1) in the opposite sex are indicated. Non-biased genes are plotted in black. Male-biased genes are plotted in blue; female-biased genes are plotted in pink. Darker colors indicate high magnitude of bias. R-squared values for each category are indicated.
